# Supplementary material for: Most ornamental plants on sale in garden centres are unattractive to flower-visiting insects
Source: PeerJ journal article supplement (doi:10.7717/peerj.3066), 2017-03-07
Supplement: Supplemental_Material_-_Table_S1.pdf [file Supplemental_Material_-_Table_S1.pdf]

**Table S1. Comparison of plant variety attractiveness to flower-visiting insects in relation to other surveys, all conducted in East Sussex, UK.**

|                                     | This study <sup>1</sup> | Garbuzov & Ratnieks (2014) <sup>2</sup> | Garbuzov et al. (2015) <sup>1</sup> |
|-------------------------------------|-------------------------|-----------------------------------------|-------------------------------------|
| <i>Origanum vulgare</i>             |                         |                                         |                                     |
| Rank, range                         | 1 - 6 of 68 - 74        | 1 - 11 of 32                            | -                                   |
| Rank, mean                          | 4.0                     | 6.0                                     | 3 of 79                             |
| Rank, mean percentile               | 6%                      | 19%                                     | 4%                                  |
| Insect count/m <sup>2</sup> , range | 7.8 - 46.9              | 2.8 - 7.2                               | -                                   |
| Insect count/m <sup>2</sup> , mean  | 20.2                    | 5.0                                     | 11.2                                |
| Sample size                         | 6                       | 2                                       | 1                                   |
| <i>Dahlia</i> , open-flowered       |                         |                                         |                                     |
| Rank, range                         | 2 - 42 of 68            | 10 - 19 of 32                           | 11 - 39 of 79                       |
| Rank, mean                          | 13.6                    | 15.0                                    | 21.0                                |
| Rank, mean percentile               | 20%                     | 47%                                     | 27%                                 |
| Insect count/m <sup>2</sup> , range | 0.2 - 11.3              | 1.4 - 2.8                               | 0.1 - 1.8                           |
| Insect count/m <sup>2</sup> , mean  | 6.9                     | 1.9                                     | 1.0                                 |
| Sample size                         | 7                       | 4                                       | 4                                   |
| <i>Lavandula angustifolia</i>       |                         |                                         |                                     |
| Rank, range                         | 5 - 42 of 59 - 69       | 18 - 28 of 32                           |                                     |
| Rank, mean                          | 25.6                    | 22.8                                    |                                     |
| Rank, mean percentile               | 40%                     | 71%                                     | n/a                                 |
| Insect count/m <sup>2</sup> , range | 0.0 - 10.5              | 0.3 - 1.3                               |                                     |
| Insect count/m <sup>2</sup> , mean  | 3.5                     | 0.9                                     |                                     |
| Sample size                         | 5                       | 12                                      |                                     |
| <i>Nepeta</i>                       |                         |                                         |                                     |
| Rank, range                         | 7 - 37 of 66 - 74       | 6 - 7 of 32                             | -                                   |
| Rank, mean                          | 17.3                    | 6.5                                     | 23 of 79                            |
| Rank, mean percentile               | 25%                     | 20%                                     | 29%                                 |
| Insect count/m <sup>2</sup> , range | 2.7 - 23.0              | 3.2 - 3.2                               | -                                   |
| Insect count/m <sup>2</sup> , mean  | 11.1                    | 3.2                                     | 0.6                                 |
| Sample size                         | 3                       | 2                                       | 1                                   |
| <i>Pelargonium</i>                  |                         |                                         |                                     |
| Rank, range                         | 24 - 57 of 68 - 74      | 32 of 32                                | 54 - 68 of 79                       |
| Rank, mean                          | 51.5                    | 32.0                                    | 64.5                                |
| Rank, mean percentile               | 73%                     | 100%                                    | 82%                                 |
| Insect count/m <sup>2</sup> , range | 0.0 - 11.1              | 0.0 - 0.1                               | 0.00 - 0.02                         |
| Insect count/m <sup>2</sup> , mean  | 1.9                     | 0.06                                    | 0.0                                 |
| Sample size                         | 6                       | 2                                       | 4                                   |

<sup>1</sup>Attractiveness estimated at or near peak of flowering period; <sup>2</sup>Attractiveness estimated over the whole flowering period
